# Supplementary material for: Meta-Analysis for the Association between Polymorphisms in Interleukin-17A and Risk of Coronary Artery Disease
Source: PubMed Central journal article supplement (PMC4962201; doi:10.3390/ijerph13070660), 2016-06-30
Supplement: ijerph-13-00660-s001.pdf [file ijerph-13-00660-s001.pdf]

# Supplementary Materials: Meta-Analysis for the Association between Polymorphisms in Interleukin-17A and Risk of Coronary Artery Disease

Mei-Hua Bao, Huai-Qing Luo, Ju Xiang, Liang Tang, Li-Ping Dong, Guang-Yi Li, Jie Zeng and Jian-Ming Li

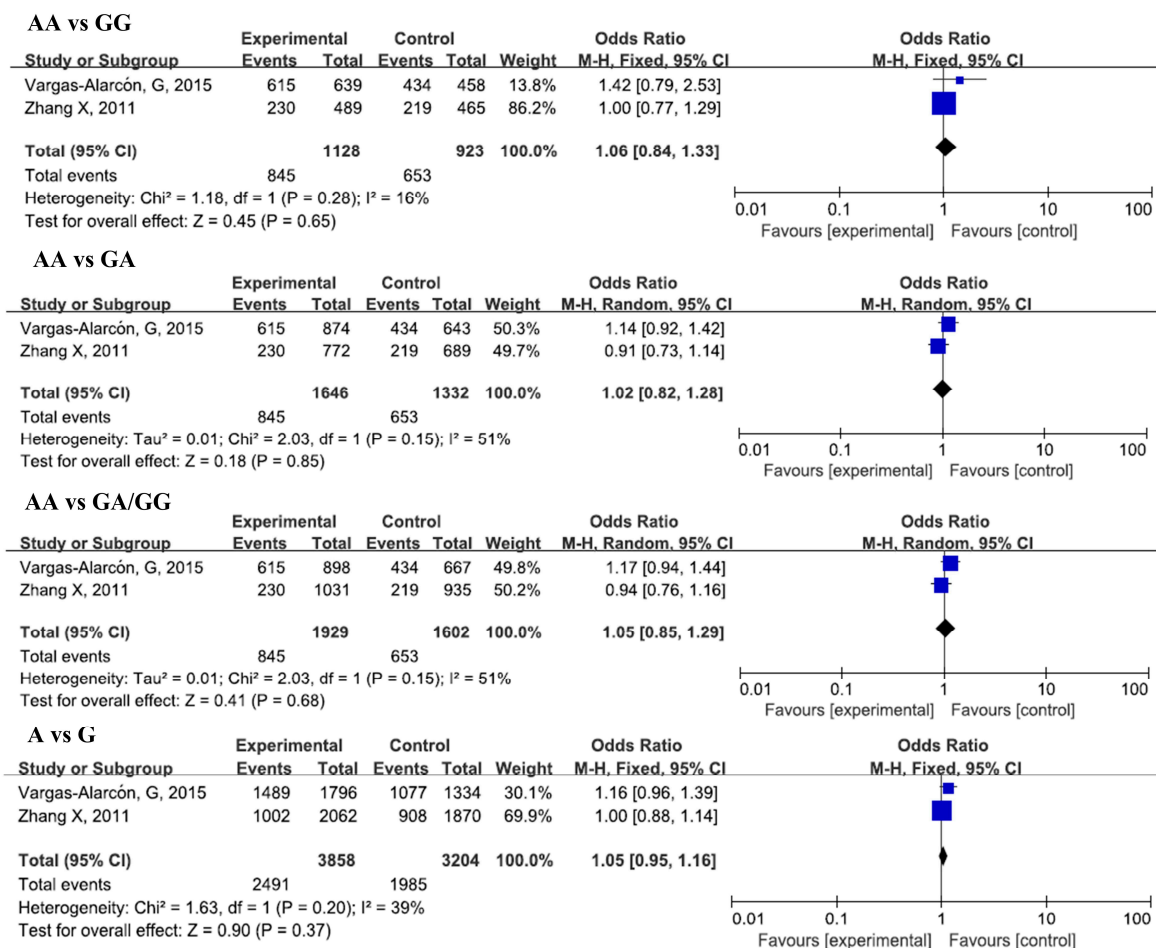

Figure S1. Forest plots of odds ratio for the association of IL-17A rs3819024 with risk of CAD.

**AA vs GG**

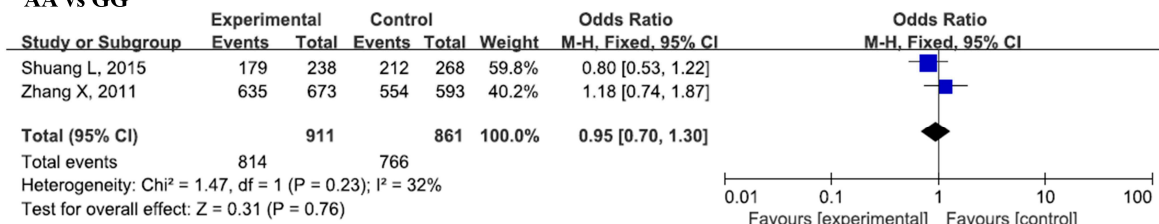

**AA vs GA**

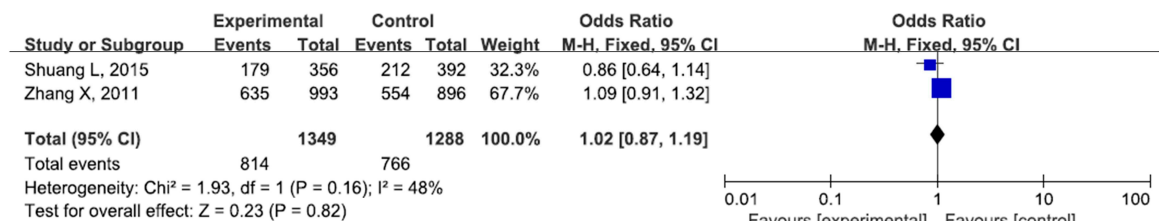

**AA vs GA/GG**

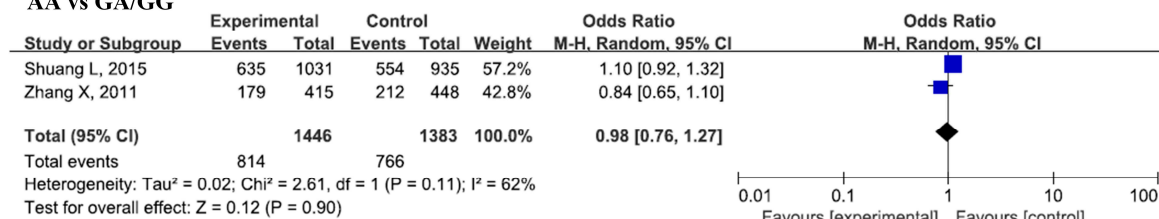

**A vs G**

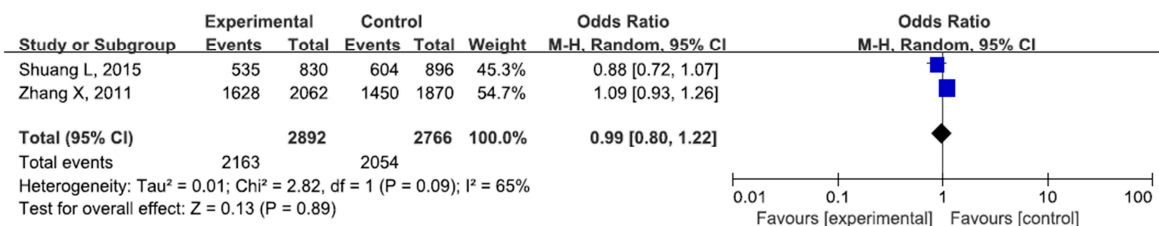

**Figure S2.** Forest plots of odds ratio for the association of IL-17A rs3819025 with risk of CAD.

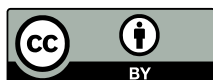

© 2016 by the authors; licensee MDPI, Basel, Switzerland. This article is an open access article distributed under the terms and conditions of the Creative Commons by Attribution (CC-BY) license (<http://creativecommons.org/licenses/by/4.0/>).
